# Supplementary material
Source: publisher figshare collection journal article supplement (https://acs.figshare.com/ndownloader/files/4565629)
Supplement: Supplementary file 1 [file 4565629]

**Supporting information for:**

# Growth of Single-Crystal Double-Directional Tellurium Nanoneedles from CdTe Nanocrystals in Solution

*Zhengtao Deng,<sup>†, ‡, §</sup> Dong Chen,<sup>†</sup> Fangqiong Tang,<sup>\*†</sup> and Masud Mansuripur<sup>‡</sup>*

<sup>†</sup> Technical Institute of Physics and Chemistry, Chinese Academy of Sciences.

<sup>‡</sup> College of Optical Science, The University of Arizona.

<sup>§</sup>Department of Chemical and Environmental Engineering, The University of Arizona.

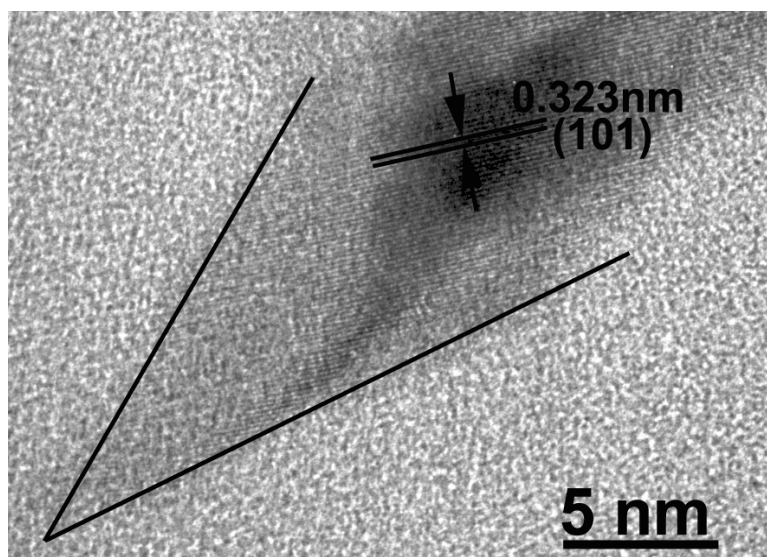

**Figure S1.** Enlarged HRTEM image of inset Figure 3d of the tip of the Te nanoneedles.

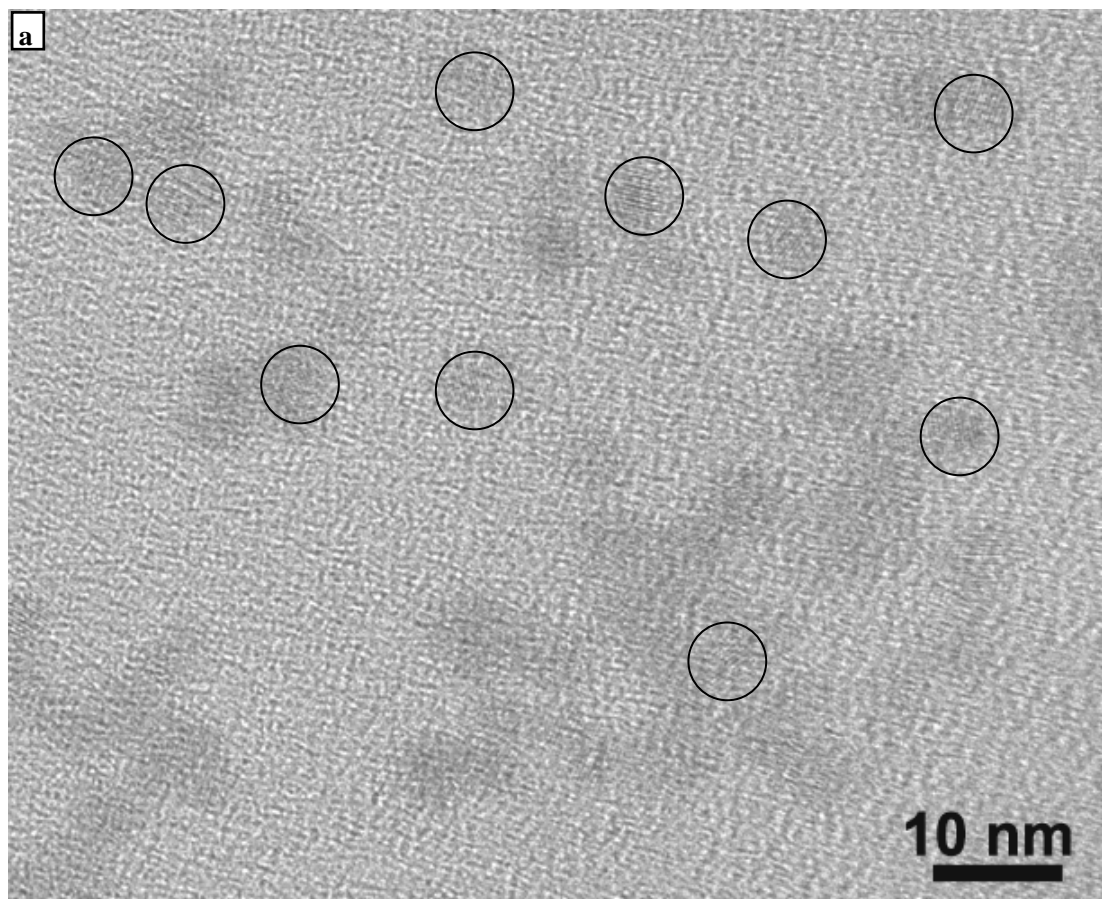

**Figure S2.** Enlarged HRTEM image of Figure 5a of the CdTe nanocrystals.
